## **Systematic Review of Prevalence of Sleep Problems in India: A Wake- up Call for Promotion of Sleep Health**

Karuna Datta<sup>1</sup>, Anna Bhutambare<sup>2</sup>, Hruda Nanda Mallick<sup>3</sup>

<sup>1</sup>Professor and Head, Department of Sports Medicine, AFMC Pune, Maharashtra, India

[karunadatta@gmail.com](mailto:karunadatta@gmail.com)

ORCID-

<https://orcid.org/0000-0003-0269-6737>

<sup>2</sup> JRF 1, DST SATYAM, Human Sleep Research Lab, c/o Dept of Sports Medicine, AFMC Pune, Maharashtra, India

<sup>3</sup> Professor and Faculty Medical Sciences, SGT University, Gurugram, Haryana

### **Conflict of Interest**

The authors have no conflict of interest

### **Acknowledgements**

The project was not funded but the meta-analysis was helped by JRF -1 who was appointed under DST SATYAM project scheme.

**Funding-** Nil

### **Data Availability**

The data is available in the manuscript and supplementary files.

## Systematic Review of Prevalence of Sleep Problems in India: A Wake- up Call for Promotion of Sleep Health

### Abstract:

An ever-increasing burden of non-communicable diseases, especially in the post pandemic times and an association of sleep problems with them highlighted a felt need to estimate the sleep problem in India. A meta-analysis of the studies conducted on Indian data was planned adhering to PRISMA guidelines. An electronic search of available literature was performed on databases including PubMed, Google Scholar, PsycNet, and Epistemonikos. 100 eligible articles were analysed. To assess the methodological quality 10-points Joanna Briggs Institute (JBI) checklist for prevalence studies was used. The pooled estimates for prevalence of Insomnia found were 25.7%, OSA 37.4%, and RLS 10.6%. An increased prevalence was seen in patients of diabetes, heart disease patients and in otherwise healthy population. Subgroup analysis showed a higher prevalence in patient population and in the otherwise healthy population too; e.g. Insomnia 32.3% (95% CI: 18.6% to 49.9%,  $I^2=99.4%$ ) and 15.1% (95% CI: 8.0% to 26.6%,  $I^2=99.1%$ ); OSA 48.1% (95% CI: 36.1% to 60.3%,  $I^2=97.4%$ ) and 14.6% (95% CI: 9.2% to 22.5%,  $I^2=97.4%$ ) and RLS 13.1% (95% CI: 8.7% to 19.3%,  $I^2=91.9%$ ) and 6.6% (95% CI: 2.4% to 16.4%,  $I^2=99.1%$ ) respectively. Excessive daytime sleepiness remained prevalent (19.6%) (95% CI: 8.4% to 39.1%,  $I^2=99.8%$ ) in the healthy, which was alarming. A multipronged approach for sleep management, evaluation and research is the need of the hour for managing non communicable disorders and for promoting sleep health in the healthy population.

### 1. Introduction

Understanding the burden of sleep problems on a community is the first step to ensure that the system gears up to take control. Sleep problems and disorders are widely prevalent and continue to emerge especially in the post pandemic world<sup>1</sup>. Establishing prevalence of a problem in the country can help and devise strategies to counter them. A need to develop strategies to combat sleep problems and reduce the burden of these disorders is vital<sup>2</sup>. There was a felt need to analyse the prevalence of sleep problems in India from the available published literature. Moreover, there is an increasing burden of non-communicable diseases. Sleep plays an important role in the pathophysiology of these diseases. Sleep disorders add an allostatic load and hamper the progression of these diseases.

### 2. Material and Methods:

'Meta-analysis of epidemiological studies on prevalence of sleep disorders in Indian population' Trial was registered with Prospero (ID- CRD42022368993).

#### 2.1 Search Strategy:

The Preferred Reporting Items for Systematic Reviews and Meta Analysis (PRISMA) protocol 2021 guidelines were followed for this systematic review<sup>3</sup>. An electronic search of available literature was performed on databases including PubMed, Google Scholar, PsycNet, and Epistemonikos. The search keywords consist of various sleep diseases with Boolean Operator (OR) and Boolean Operator (AND) India to combine studies only from India was used. We applied no language restriction and no publication time restriction. Detailed search strategy is provided in **supplementary material (S1)**.

## 2.2 Eligibility Criteria and Study Selection:

All the studies conducted on humans in the region of India reporting prevalence of any sleep disorder was included. We included all kinds of studies conducted on various participants (any age group, patients, or general population.). Exposure to any kind of sleep related disorders like-Insomnia, hypersomnia, parasomnia, sleep apnea, sleep paralysis, restless leg Syndrome (RLS), narcolepsy, snoring, chronic fatigue syndrome, seasonal affective disorder, REM sleep behaviour disorder, non-REM sleep behaviour disorder, excessive daytime sleepiness (EDS), periodic limb movement, sleep talking, sleep terror, sleep related breathing disorder, circadian rhythm sleep disorder was considered. Titles and abstracts of the available studies were assessed by two reviewers independently to check if they met the inclusion criteria.

## 2.3 Data Collection:

The systematic review was done for the available literature to study the prevalence of sleep disorders in India. The initial literature search resulted in 1802 relevant articles. Of the 1802 articles, 152 articles were initially found eligible. Articles without full text and those in duplicate were removed. PubMed search provided 1200 articles, after screening only 90 articles which reported relevant data were included. PsycNet search produced 202 articles. None of these articles were eligible after screening. Google scholar search provided 250 articles, out of these 37 reported relevant data but 30 articles were repeated thus only 7 articles were included. Epistemonikos search provided 150 articles, only 3 were relevant and finally included. Thus, a total of 100 relevant articles were used for final analysis. The study selection process is shown in **Figure1**.

## 2.4 Data Extraction:

After removing duplicate studies, full text articles were reviewed and following data was extracted - Author name, year of publication, study title, study design, type of study participants, number of participants, age group, disease addressed in the study, number of events or proportion of cases, scale used for disease assessment. If relevant data was not available or full text article was not freely available, then corresponding authors were contacted by email and were requested to provide full text article or relevant data. The relevant data was manually checked by one author and was rechecked by the other author independently. Final table prepared showing detailed characteristics of the included studies is placed in **Table 1**.

## 2.5 Quality assessment of included study

The quality assessment of the included studies for prevalence was done using Joanna Briggs Institute (JBI) checklist <sup>4</sup>. It consists of ten questions/checklist points with response to each as either 'yes', 'no', 'unclear' or not applicable'. For each 'yes', the study is rewarded 1 point otherwise zero and hence a cumulative score 0-10 is allotted. Quality assessment was done independently by two reviewers (AB and KD) and in case of any discrepancy third reviewer was asked. Based on JBI appraisal tool total scores were calculated and articles were assigned quality points.

## 2.6 Data Analysis:

A random-effect model was used with inverse variance method for estimating the pooled prevalence or the overall prevalence of some common sleep disorders. We used transformed proportion using logit transformation instead of raw proportion values. The between-study heterogeneity variance was estimated using  $\tau^2$  (tau-squared) and  $I^2$  statistic with restricted maximum-likelihood estimator method.

Also, the prediction interval for future studies was computed to give the expected range of true prevalence in a new study, using the data. To evaluate between study heterogeneity Cochran's Q-test was done. Subgroup analysis was also done based on participants' type (Healthy or Patient) and, again based on age group for studies based on healthy participants.

All statistical analysis was conducted in statistical R-software (Version 4.1.2) using the packages 'meta' and 'metafor'.

### 3. Results:

100 studies included in the final analysis showed major sleep disorders like insomnia, obstructive sleep apnea (OSA), restless leg syndrome (RLS) on a sample of 67844 individuals. Meta-analysis for each disorder was done. Excessive daytime sleepiness (EDS) remained a symptom which was found in many studies and analysis for EDS was done. Studies reporting insomnia or insomnia like features<sup>5-29</sup>, OSA<sup>13,22,26,27,29-75</sup>, RLS<sup>10,15,19,25,28,76-90</sup> and excessive daytime sleepiness<sup>11,17,40,59,60,67,72,80,88,91-104</sup> were analysed. The details of which are tabulated in Table 1.

The studies in relation to insomnia, OSA, RLS and EDS have been tabulated and provided in **Table 1**. **Table 1** also shows the quality assessment score. The quality score based on JBI appraisal tool for prevalence studies showed a median score was 7 (range: 4-10) points. There were 4 studies with lowest JBI score of 4 and 7 with the highest JBI score of 10.

**Table1:** Detailed Characteristics of the Studies Included in the Systematic Review

| Sr No. | Author                      | Study Design                        | Participants Group                                       | Sample Size(n) | Age(Mean±SD) /Age Group | Assessment Tool                                | Sleep Disorder Addressed | JBI Score (0-10) |
|--------|-----------------------------|-------------------------------------|----------------------------------------------------------|----------------|-------------------------|------------------------------------------------|--------------------------|------------------|
| 1      | H. K. Aggarwal et al., 2017 | Cross sectional study               | CKD stage III to V patients                              | 200            | 50.11±13.99             | PSQI                                           | Insomnia                 | 7                |
| 2      | S. Ahmad et al., 2013       | Cross sectional study               | Adults with CKD                                          | 104            | 54.17±12.96             | ISI, STOP-BANG                                 | Insomnia                 | 9                |
| 3      | Jain et al., 2017           | Cross sectional study               | Type-2 diabetes patients                                 | 50             | 48.25±19.05             | ISI                                            | Insomnia                 | 7                |
| 4      | Dahale et al., 2020         | Multicentre cross sectional survey  | Elderly patients attending PHCs                          | 1574           | 68.6±6.3                | ISI                                            | Insomnia                 | 8                |
| 5      | Uvais et al., 2021          | Cross sectional study               | Nurse and other staff                                    | 347            | 29.12±6.85              | ISI                                            | Insomnia                 | 7                |
| 6      | Panda et al., 2012          | Observational cross sectional study | Healthy subjects accompanying patients                   | 1050           | 35.1±8.7                | ESS, PSQI                                      | RLS, Insomnia            | 9                |
| 7      | Shivashankar et al., 2017   | Cross sectional study               | Healthy participants                                     | 16287          | 42.03±12.43             | Sleep Habbits questionnaire, ESS               | Insomnia, EDS            | 6                |
| 8      | Katyayan et al., 2019       | Cross sectional study               | Healthy subjects                                         | 850            | 44.68±10.44             | ESS, BQ, STOP BANG                             | Insomnia                 | 8                |
| 9      | Dewan et al., 2022          | Questionnaire-based survey study    | Dental students                                          | 1115           | 21±1.8                  | SLEEP-50 questionnaire (that had 50 questions) | OSA, Insomnia            | 6                |
| 10     | Jain et al., 2020           | Cross sectional study               | Students University of Rajasthan and affiliated colleges | 954            | 23.81±3.72              | ISI                                            | Insomnia                 | 7                |
| 11     | N. Kumar et al., 2022       | Cross-sectional study               | General People                                           | 1596           | 39.76±13.1              | Standard questionnaire                         | RLS, Insomnia            | 4                |
| 12     | Khan et al., 2018           | Epidemiological study               | Adult population of a district                           | 1700           | 39.4±13.9               | ISI, door to door survey                       | Insomnia                 | 9                |
| 13     | Sreedharan et al., 2016     | Cohort study                        | PSG proven OSA patients                                  | 152            | 53.81±12.01             | PSG                                            | Insomnia, EDS            | 7                |
| 14     | Jaisooriya et al., 2018     | Cross sectional study               | General patients at OPD(PHCs)                            | 7017           | 41.4±11.1               | ISI                                            | Insomnia                 | 8                |
| 15     | Panda et al., 2018          | Observational study                 | Patients with definite and probable ALS                  | 40             | 56.6±9.4                | ESS, PSQI                                      | RLS, Insomnia            | 6                |
| 16     | Mondal et al., 2018         | Observational cross sectional study | Psychiatric outpatients                                  | 500            | 42.2±15.3               | ISI                                            | Insomnia                 | 7                |
| 17     | Jain et al., 2014           | Prospective study                   | Traumatic brain injury patients                          | 204            | 33.34±12.9              | ISI                                            | Insomnia                 | 6                |

It is made available under a [CC-BY-ND 4.0 International license](https://creativecommons.org/licenses/by-nd/4.0/) .

|    |                                |                                                 | more than 3 months.                                          |      |                  |                                            | Insomnia           |   |
|----|--------------------------------|-------------------------------------------------|--------------------------------------------------------------|------|------------------|--------------------------------------------|--------------------|---|
| 19 | Naik et al., 2021              | Prospective observational study                 | Patients aged > 18 years with laboratory-confirmed COVID-19  | 1234 | 41.6 ± 14.2      | Interviews conducted by trained residents  | Insomnia           | 7 |
| 20 | Tomar et al., 2018             | Cross sectional                                 | Post-traumatic brain injury patients                         | 100  | 35.07 ± 12.88    | ISI, PHQ-9                                 | Insomnia           | 9 |
| 21 | A. Kumar et al., 2021          | Cross-sectional study                           | Patients with chronic liver disease                          | 131  | 48.7 ± 12.31     | PHQ-9, PSQI                                | RLS, Insomnia      | 8 |
| 22 | Devaraj et al., 2013           | Cross sectional                                 | Patients with a recent Myocardial Infarction                 | 44   | 57.5 ± 10.44     | PSG, ESS, BQ                               | OSA, Insomnia      | 8 |
| 23 | Ramakrishnan et al., 2012      | Descriptive study                               | General patients visited sleep centre                        | 1765 | All age patients | PSG                                        | OSA, Insomnia      | 6 |
| 24 | N. Kumar et al., 2021          | Cross-sectional study                           | Parkinson's disease                                          | 832  | 66.9 ± 18.39     | Online survey with validated questionnaire | RLS, Insomnia      | 6 |
| 25 | Jasti et al., 2018             | Cross-sectional study                           | Parkinsonism patients                                        | 168  | 65.3 ± 12.8      | PSQI, ESS, PDSS-2                          | OSA, EDS, Insomnia | 7 |
| 26 | Kishan et al., 2021            | Cross Sectional observational                   | Chronic heart failure patients                               | 103  | 62.65 ± 11.8     | ESS, STOP-BANG, BQ                         | OSA                | 7 |
| 27 | Shanmugam et al., 2015         | Cross-sectional prospective observational study | CKD patients                                                 | 302  | All age patients | BQ                                         | OSA                | 7 |
| 28 | A. Singh et al., 2021          | Cross sectional study                           | Type 2 diabetes patients                                     | 149  | 63.42 ± 12.31    | STOP-BANG                                  | OSA                | 9 |
| 29 | Viswanathan et al., 2017       | Cross sectional study                           | Type 2 diabetes patients                                     | 203  | 54 ± 8           | AHI                                        | OSA                | 6 |
| 30 | Malik et al., 2017             | Cross sectional study                           | Type 2 diabetes patients                                     | 62   | 60.82 ± 11.34    | PSG                                        | OSA                | 8 |
| 31 | Goyal et al., 2018             | School-based cross-sectional                    | School students                                              | 1346 | 6.81 ± 2.18      | SRBD scale                                 | OSA                | 9 |
| 32 | S. K. Sharma & Sreenivas, 2010 | Cross sectional study                           | Middle aged urban Indians in South Delhi                     | 351  | 43 ± 13.2        | PSG                                        | OSA                | 8 |
| 33 | S. K. Sharma et al., 2010      | Cross sectional study                           | Individuals of either gender aged 30-65 years                | 365  | 47.5 ± 13.8      | Validated questionnaire, PSG               | OSA                | 7 |
| 34 | Shaily Saxena, 2006            | Observational cross sectional study             | Individuals above 18 years of age                            | 1188 | 44.27 ± 10.79    | Sleep questionnaires                       | OSA                | 7 |
| 35 | Joseph et al., 2020            | Cross sectional study                           | Pregnant women                                               | 214  | 27.2 ± 4.7       | STOP-BANG, ESS                             | OSA                | 5 |
| 36 | Choudhury et al., 2019         | Cross sectional study                           | Rural community of Odisha                                    | 200  | 50 ± 16.3        | BQ                                         | OSA, EDS           | 6 |
| 37 | Pinto et al., 2018             | Observational cross sectional study             | Adult population                                             | 321  | 39.43 ± 15.6     | ESS, Modified BQ                           | OSA                | 8 |
| 38 | K. Aggarwal et al., 2021       | Cross-sectional and observational study         | Undergraduate college students                               | 493  | 20.3 ± 1.53      | PSQI                                       | OSA                | 7 |
| 39 | Agrawal et al., 2011           | Cross sectional study                           | Patients with and without OSA                                | 272  | 45.29 ± 8.96     | PSG                                        | OSA                | 8 |
| 40 | Surya Kant, 2019               | Prospective observational study                 | Patients of Pulmonology Outpatient Department                | 48   | All age patients | PSG                                        | OSA                | 6 |
| 41 | Anand et al., 2021             | Cross sectional prospective study               | Children with Down syndrome                                  | 53   | 7.4 ± 3.47       | PSG                                        | OSA                | 4 |
| 42 | Nanaware et al., 2006          | Retrospective study                             | Suspected sleep disordered breathing children under 18 years | 56   | 11.5 ± 5.13      | PSG                                        | OSA                | 4 |
| 43 | Kaswan et al., 2021            | Prospective cross section                       | Diabetes mellitus patient                                    | 362  | 55.7 ± 10        | STOP-BANG, ESS                             | OSA                | 9 |
| 44 | Devaraj et al., 2017           | Prospective cohort                              | Patients underwent non-cardiac surgery                       | 182  | 48.9 ± 14.41     | PSG, STOP-BANG                             | OSA                | 9 |
| 45 | Lorenzoni et al., 2019         | Observational cross sectional study             | Obese children                                               | 45   | 10.5 ± 0.75      | PSG                                        | OSA                | 6 |
| 46 | Dixit et al., 2018             | Cross sectional study                           | Adult patients of bronchial asthma                           | 50   | 48.16 ± 14.9     | PSG                                        | OSA                | 6 |
| 47 | Tripathi et al., 2019          | Cross sectional study                           | Elderly completely edentulous patients                       | 183  | 62.5 ± 1.97      | PSG, ESS                                   | OSA                | 9 |
| 48 | Reddy et al., 2009             | Cross sectional, community based study          | Middle-aged urban of South Delhi                             | 2505 | 47.5 ± 13.8      | PSG                                        | OSA                | 9 |
| 49 | S. K. Mahajan et al., 2021     | Cross sectional study                           | Patients with acute coronary syndrome                        | 66   | 57.7 ± 11.1      | PSG                                        | OSA                | 8 |
| 50 | Prasad et al., 2017            | Comparative study                               | Subjects who underwent polysomnography at                    | 210  | 46.5 ± 13.7      | PSG                                        | OSA                | 8 |

It is made available under a [CC-BY-ND 4.0 International license](https://creativecommons.org/licenses/by-nd/4.0/) .

|    |                                    |                                                   | sleep lab                                                                         |      |             |                                                |          |    |
|----|------------------------------------|---------------------------------------------------|-----------------------------------------------------------------------------------|------|-------------|------------------------------------------------|----------|----|
| 51 | Kamgo et al., 2022                 | Prospective observational study                   | Interstitial Lung Disease patients                                                | 41   | 55.5±10     | PSG                                            | OSA      | 6  |
| 52 | R. Kumar et al., 2013              | Cross Sectional observational                     | Patients with asthma and COPD                                                     | 400  | 35.8±7.9    | ESS, BQ                                        | OSA      | 8  |
| 53 | Sehgal et al., 2016                | Cross sectional study                             | Patients with metabolic syndrome                                                  | 50   | 47.1±6.6    | PSG, ESS                                       | OSA      | 6  |
| 54 | Nair et al., 2022                  | Cross sectional study                             | Patients with sleep disordered breathing                                          | 142  | 49.7±14.6   | Level 1 PSG                                    | OSA      | 10 |
| 55 | Priyadarshini et al., 2017         | Observational cross sectional study               | Obese patients seeking bariatric surgery                                          | 27   | 42.4±10.5   | PSG, ESS, BQ                                   | OSA, EDS | 7  |
| 56 | Nattusami et al., 2021             | Cross sectional study                             | Patients with stable COPD                                                         | 301  | 59.6±10     | PSG, ESS                                       | OSA, EDS | 10 |
| 57 | Shoib et al., 2017                 | Cross-sectional study                             | Patients suffering from depression                                                | 182  | 54.89±12.93 | PSG                                            | OSA      | 10 |
| 58 | Utpat et al., 2020                 | Prospective observational study                   | Interstitial lung disease patients                                                | 100  | 56.44±20.52 | PSG                                            | OSA      | 9  |
| 59 | Bhaisare et al., 2022              | Prospective observational study                   | Diagnosed lung cancer patients                                                    | 30   | 55±8        | PSG, ESS                                       | OSA      | 8  |
| 60 | Agrawal et al., 2013               | Cross sectional study                             | Patients of ASA I-III scheduled for elective surgical procedures under anesthesia | 204  | 42.7±15.08  | STOP-BANG                                      | OSA      | 7  |
| 61 | Kaul et al., 2001                  | Cross Sectional observational study               | Primary sleep disturbances patients                                               | 60   | 46.36±7.89  | PSG                                            | OSA      | 7  |
| 62 | Jain & Sahni, 2002                 | Prospective observational study                   | Children adenoidectomy and/or tonsillectomy                                       | 40   | 8±3.15      | PSG                                            | OSA      | 6  |
| 63 | Ghosh et al., 2020                 | Cross sectional study                             | Population study                                                                  | 1000 | 47±13       | BQ                                             | OSA, EDS | 7  |
| 64 | Tripathi et al., 2018              | Cross Sectional observational study               | Non-obese male subjects                                                           | 120  | 45±7.8      | PSG                                            | OSA      | 5  |
| 65 | P. Singh et al., 2022              | Prospective study                                 | Coronary artery disease patients                                                  | 100  | 35.14±4.35  | PSG                                            | OSA      | 7  |
| 66 | Dubey et al., 2018                 | Cross sectional study                             | Male Driving License recipients                                                   | 542  | 31.8±13.2   | STOP-BANG                                      | OSA      | 9  |
| 67 | Mathiyalagen et al., 2019          | Cross sectional study                             | Patients attending a non-communicable disease clinic                              | 473  | 51±11.34    | Pre-tested semi-structured questionnaire       | OSA      | 10 |
| 68 | M. Kumar et al., 2021              | prospective cross-sectional study                 | Patients with cirrhosis                                                           | 1098 | 48.3±10.5   | PSQI, ESS                                      | OSA, EDS | 10 |
| 69 | Rohatgi et al., 2018               | Preliminary study                                 | Patients suffering from schizophrenia spectrum disorder                           | 43   | 32.2±10.1   | Berlin Questionnaire                           | OSA      | 8  |
| 70 | L. Ahmad et al., 2020              | Prospective, cross-sectional hospital-based study | Adolescent patients who reported to Orthodontic OPD                               | 213  | 16±3.4      | STOP-BANG                                      | OSA      | 9  |
| 71 | Selvaraj & Keshavamurthy, 2016     | Cross sectional study                             | Parkinson's Disease patients                                                      | 50   | 57.16±6.6   | PDSS, ESS                                      | OSA      | 6  |
| 72 | Bhagawati et al., 2019             | Cross-sectional study                             | Patients with CKD who were >18 years of age                                       | 300  | 47.58±15.04 | IRLSSG rating scale                            | RLS      | 10 |
| 73 | Pinheiro et al., 2020              | Cross sectional study                             | Type-2 diabetes                                                                   | 210  | 56±13.5     | IRLSSG rating scale                            | RLS      | 6  |
| 74 | R. Gupta et al., 2017              | Population based door to door study               | Subjects 18 and 84 years in Himalayan and Sub-Himalayan region                    | 1689 | 35.2±10.9   | Cambridge-Hopkins RLS diagnostic questionnaire | RLS      | 9  |
| 75 | Rangarajan et al., 2007            | Cross-sectional, questionnaire-based study        | Adult residents of Bangalore                                                      | 1266 | 49.4±24.4   | Face-to-face interview, IRLSSG scale           | RLS      | 7  |
| 76 | Bellur et al., 2022                | Cross-sectional observational study               | College students                                                                  | 4211 | 18±1.48     | PSQI, ESS                                      | RLS      | 7  |
| 77 | Joseph et al., 2022                | Cross-sectional study                             | General population of Mangalore                                                   | 202  | 29±13       | PSQI                                           | RLS      | 6  |
| 78 | R. Gupta et al., 2012              | Cross sectional study                             | Patients who presented with insomnia or leg pain                                  | 653  | 39.86±12.8  | IRLS Hindi version                             | RLS      | 7  |
| 79 | Halkurike-Jayadevappa et al., 2019 | Prospective observational study                   | Adult patients with cirrhosis                                                     | 356  | 48±25.6     | IRLS scoring system                            | RLS      | 9  |
| 80 | Bhowmik et al., 2003               | Comperative study                                 | Hemodialysis patients                                                             | 121  | 34.5±11.1   | Pre designed questionnaire                     | RLS      | 5  |
| 81 | R. Gupta et al., 2018              | Cross sectional                                   | Patients with opioid use disorder                                                 | 19   | 30.2±10.4   | Pre designed                                   | RLS      | 6  |

It is made available under a [CC-BY-ND 4.0 International license](https://creativecommons.org/licenses/by-nd/4.0/) .

|     |                                                | observational study                 |                                                                             |      |             | questionnaire                              |          |    |
|-----|------------------------------------------------|-------------------------------------|-----------------------------------------------------------------------------|------|-------------|--------------------------------------------|----------|----|
| 82  | Bathla et al., 2016                            | Cross sectional study               | Patients undergoing hemo dialysis                                           | 194  | 54.5±15     | Face-to-face interview, IRLS questionnaire | RLS      | 7  |
| 83  | A. Gupta et al., 2017                          | Prospective study                   | Stroke patients                                                             | 346  | 54.87±12.03 | Pre-structured sleep questionnaire         | RLS      | 9  |
| 84  | Velu et al., 2022                              | Cross sectional study               | Patients with End-stage kidney disease                                      | 148  | 44±14.5     | ESS, PSQI                                  | RLS, EDS | 10 |
| 85  | R. Gupta et al., 2013                          | Cross sectional observational study | Subjects presenting to psychiatry OPD with complaints of depressive illness | 54   | 35.58±33.22 | MINI-Plus Interview, IRLSSG criteria       | RLS      | 9  |
| 86  | Raj & Ramesh, 2021                             | Cross sectional study               | Patients diagnosed with Tuberculosis                                        | 206  | 41±16.2     | PSQI, ESS                                  | RLS, EDS | 6  |
| 87  | Raj et al., 2019                               | Cross-sectional study               | Type 2 diabetes patients                                                    | 102  | 56.88±10.98 | ESS                                        | RLS, EDS | 7  |
| 88  | Kaur & Singh, 2017                             | Cross-sectional study               | College students                                                            | 1215 | 19.5±4.7    | ESS                                        | EDS      | 4  |
| 89  | A. Singh et al., 2017                          | Prospective cross sectional study   | Subjects with age groups ≥ 25 years                                         | 1512 | 42.6±11.2   | ESS, face to face interview                | EDS      | 5  |
| 90  | Roopa et al., 2010                             | Cross sectional study               | Random subjects age d 20-76 from Chennai Urban Rural                        | 358  | 43.7±12.7   | Standard validated questionnaire           | EDS      | 8  |
| 91  | Krishnaswamy et al., 2016                      | Prospective study                   | Bus drivers working in Karnataka State Road Transportation Corporation      | 180  | 41.4±9.3    | ESS                                        | EDS      | 6  |
| 92  | Ghante et al., 2021                            | Cross-sectional study               | Postnatal women                                                             | 225  | 25.16±3.98  | ESS, PSQI                                  | EDS      | 7  |
| 93  | Dey et al., 2020                               | Cross-sectional study               | Doctors from all the clinical department                                    | 100  | 35.32±6.21  | PSQI, ESS                                  | EDS      | 8  |
| 94  | Venkatnarayan et al., 2022                     | Cross sectional observational study | OSA patients                                                                | 100  | 49.5±13.3   | PSG                                        | EDS      | 5  |
| 95  | Shoib et al., 2022                             | Cross-sectional study               | OSA patients                                                                | 182  | 54.89±12.89 | PSG, ESS                                   | EDS      | 6  |
| 96  | Samanta et al., 2013                           | Cross sectional observational study | Patients of cirrhosis                                                       | 100  | 49.1±11.4   | PSQI, ESS                                  | EDS      | 5  |
| 97  | P. Sharma et al., 2016                         | Cross-sectional study               | Patients with schizophrenia                                                 | 100  | 30.63±8.7   | PSQI, ESS                                  | EDS      | 7  |
| 98  | Sreedharan et al., 2021                        | Prospective study                   | Patients getting admitted for coronary artery bypass surgery                | 120  | 60±11.5     | STOP-BANG                                  | EDS      | 7  |
| 99  | S. Mahajan et al., 2012                        | Cross sectional observational study | Patients on maintenance hemodialysis for >3 months                          | 47   | 37.1±13.1   | ESS                                        | EDS      | 5  |
| 100 | Kadam Y, Patil S, Waghachavare V, Gore A, 2016 | Cross sectional study               | College students from an urban area                                         | 900  | 19.3±1.5    | Pre tested self-administered questionnaire | EDS      | 6  |

Note: CKD: Chronic Kidney Disease, OSA: Obstructive sleep apnea, RLS: Restless Legs Syndrome, EDS: Excessive daytime sleepiness PSQI: Pittsburgh Sleep Quality Index, PHC: Primary Health Centre, ESS: Epworth Sleepiness Scale, ISI: Insomnia Severity Index, PSG: Polysomnography, PHQ-9: Patients Health Questionnaire, BDI: Beck Depression Inventory, BSA: Berlin Sleep Apnea, BQ: Berlin Questionnaire, PDSS-2: Parkinson Disease Sleep Score-2, AHI: Apnea Hypopnea Index, SRBD: Sleep Related Breathing Disorder, COPD: Chronic Obstructive Pulmonary Disease, PDSS-III: Parkinson Disease Sleep Score Part-III, IRLSSG: International Restless Legs Syndrome Study Group, IRLS: International Restless Legs Syndrome severity scoring, MINI-Plus: Mini International Neuropsychiatric Interview Plus, JBI: Joanna Briggs Institute

A preliminary prevalence of pooled data for insomnia, OSA, and RLS was carried out. The studies showed both healthy and patient population data. Meta-analysis forest plots are shown in **Supplementary Figures 1-4**. Studies were analysed disease wise for general population and patient population and subgroup analysis done for Insomnia, OSA and RLS as shown in **Table 2(A)**. Subgroup analysis was conducted in healthy population for prevalence of Insomnia, OSA, and RLS as shown in **Table 2(B)**. Meta-analysis for EDS was also conducted with subgroup analysis based on participant types (healthy and patients) and further based on population group (College students and Adult General Population) in studies with healthy participants as shown in **Table 3**. Forest plots are shown in **Figures 2, 3 and 4** respectively. Some studies showed the prevalence of multiple sleep disorders whereas some only focussed on one of the sleep disorders, so they are included in the disorder or disorders as applicable.

**Table 2:** Prevalence of Insomnia, OSA and RLS among Healthy and Patient Population Groups

| Subgroup Analysis                  | Prevalence (95% CI, I <sup>2</sup> )                  |
|------------------------------------|-------------------------------------------------------|
| <b>A. Participants' group</b>      |                                                       |
| <b>i). Insomnia</b>                | 15.1% (95% CI: 8.0% to 26.6%, I <sup>2</sup> =99.1%)  |
| Healthy population (k=8)           | 32.3% (95% CI: 18.6% to 49.9%, I <sup>2</sup> =99.4%) |
| Patient population (k=17)          | 25.7% (95% CI: 16.3% to 38.0%, I <sup>2</sup> =99.4%) |
| Overall                            |                                                       |
| <b>ii). OSA</b>                    | 14.6% (95% CI: 9.2% to 22.5%, I <sup>2</sup> =97.4%)  |
| Healthy population (k=13)          | 48.1% (95% CI: 36.0% to 60.9%, I <sup>2</sup> =97.4%) |
| Patient population (k=38)          | 37.4% (95% CI: 27.8% to 48.2%, I <sup>2</sup> =98.3%) |
| Overall                            |                                                       |
| <b>iii). RLS</b>                   | 6.6% (95% CI: 2.4% to 16.4%, I <sup>2</sup> =99.1%)   |
| Healthy population (k=6)           | 13.1% (95% CI: 8.7% to 19.3%, I <sup>2</sup> =91.9%)  |
| Patient population (k=14)          | 10.6% (95% CI: 7% to 15.9%, I <sup>2</sup> =97.3%)    |
| Overall                            |                                                       |
| <b>B. Healthy Population group</b> | Prevalence (95% CI, I <sup>2</sup> )                  |
| <b>i). Insomnia</b>                | 34.7% (95% CI: 17.6% to 56.9%, I <sup>2</sup> =99.0%) |
| College students (k=2)             | 11.1% (95% CI: 5.9% to 19.8%, I <sup>2</sup> =97.1%)  |
| Adult General (k=6)                |                                                       |
| <b>ii). OSA</b>                    | 30.1% (95% CI: 2.6% to 87.4%, I <sup>2</sup> =98.7%)  |
| School children (k=2)              | 19.9% (95% CI: 11.1% to 33.1%, I <sup>2</sup> =95.8%) |
| College Students (k=2)             | 11.5% (95% CI: 7.2% to 18.0%, I <sup>2</sup> =96.9%)  |
| Adult General (k=9)                |                                                       |
| <b>iii). RLS</b>                   | 8.3% (95% CI: 7.5% to 9.2%, I <sup>2</sup> =NA)       |
| College students (k=1)             | 6.2% (95% CI: 1.8% to 19.0%, I <sup>2</sup> =99.0%)   |
| Adult General (k=5)                |                                                       |

'k' is number of studies included in analysis.

**Table 3:** Prevalence of EDS among Patient population and Healthy Population

| Subgroup Analysis                   | Prevalence (95% CI, I <sup>2</sup> )                  |
|-------------------------------------|-------------------------------------------------------|
| <b>A. Participants' Group</b>       |                                                       |
| Healthy population (k=11)           | 19.6% (95% CI: 8.4% to 39.1%, I <sup>2</sup> =99.8%)  |
| Patient population (k=14)           | 31.5% (95% CI: 20.8% to 44.6%, I <sup>2</sup> =96.5%) |
| Overall                             | 25.9% (95% CI: 17.1% to 37.1%, I <sup>2</sup> =99.6%) |
| <b>B. Healthy Population Groups</b> |                                                       |
| College students (k=3)              | 55.1% (95% CI: 30.8% to 77.2%, I <sup>2</sup> =99.5%) |
| General people (k=8)                | 11.6% (95% CI: 4.6% to 26.2%, I <sup>2</sup> =99.4%)  |

'k' is number of studies included in analysis.

#### 4. Discussion:

The studies analysed showed that the patient data was being collected from outpatient department, so the patient had a morbidity for which they had reported. Some were done on caregivers and attendants<sup>9,10,97</sup> of patients while they were in hospital or attending on a patient while in outpatient department. Few studies worked on general population using representative samples of college students<sup>13,14,35,42,80,92,104</sup> and some targeted the population in general<sup>12,16,37,38,40,67,78,79,81,93,94</sup>.

A pooled data of both healthy and patient population together hints that the prevalence of sleep disorders is very high namely for insomnia being 25.7% (95% CI: 16.3% to 38.0%, I<sup>2</sup>=99.4%), OSA 37.4% (95% CI: 27.8% to 48.2%, I<sup>2</sup>=98.3%) and for RLS 10.6% (95% CI: 7% to 15.9%, I<sup>2</sup>=97.3%). It was found that the methodology implemented in the study also varied widely from surveys, face to face interviews and only few with subjective and objective parameters both. Keeping the large variance in the target population studied and the methodology adopted, the range of prevalence of sleep disorders thus had an increased range. Further subgroup analysis of general population was done to understand the prevalence in an otherwise healthy population.



We had done an analysis of prevalence of insomnia reported by various articles and our results showed an overall of 25.7 % with a high heterogeneity ( $I^2=99.4\%$ ). The high heterogeneity might have arisen both because of the methods used and the target population studied. The relative high prevalence of insomnia in patients of diabetes is glaring. This requires insomnia treatment guidelines incorporated in the comprehensive approach of dealing with such disorders. Considering the economic burden of non-communicable diseases like diabetes and hypertension in India, a holistic approach to better sleep in such disorders is warranted<sup>105,106</sup>. To ensure that the primary care physician can help in early diagnosis, management, and treatment of insomnia, it is imperative to teach basics of sleep management in MBBS curriculum. A glaring need exists for the primary care physician to be acquainted with the standard treatment guidelines<sup>107</sup>.

Further analysis on healthy participants for insomnia showed a prevalence of 34.7% (95% CI: 17.6% to 56.9%,  $I^2=99.0\%$ ) in college students and 11.1% (95% CI: 5.9% to 19.8%,  $I^2=97.1\%$ ) in general population. A relatively high prevalence in college students raises an alarm. This needs to be reformed to ensure a healthier future population. College going students should learn ill effects of sleep deprivation and importance of addressing their sleep issues earlier to avoid the resurgence of somatic complaints and psychiatric symptoms in later life. Education and self-motivation remain the cornerstone of this strategy. In fact, this education should start at a very young age. A systematic review on the effects of the pandemic on sleep in children and adolescents highlights the growing problem<sup>108,109</sup>. There is a need to develop sleep hygiene principles, like dental hygiene, right from preschool and nursery days. Study on urban school children mentioned the role parents play in setting bedtimes. The study brought out that the high school children felt that parental control was much less and that it diminished from middle school onwards<sup>110</sup>. Parental awareness to improve control over sleep times during both weekdays and weekends is vital. OSA has been studied in various diseases like diabetes, chronic heart failure, Parkinson's disease, psychiatric disorders, cirrhosis, etc. Data also exists about its prevalence in general population. Methods employed ranged from questionnaires<sup>5,6,8-10,12-14,16,18-21,24,25,29-32,34,38-40,42,44,47,48,51,52,55,56,59,60,63,64,67,70-75,80,82,84,87,88,90-97,99-104</sup>, home testing to overnight sleep studies<sup>34,49,51,52,55,58-66,68,69,98,99</sup>. In some studies, screening using questionnaires was done followed by polysomnography<sup>10,26,48,51,52,59,64,99</sup>. Our analysis of 51 studies available on India data showed a prevalence of 37.4% (95% CI: 27.8% to 48.2%,  $I^2=98.3\%$ ). There were a high heterogeneity of the study results due to different age groups, health status level i.e., healthy, and patient groups, different study designs, methodology and even outcome parameters. The prevalence varied from 9.2% to 22.5% in general population. A similar result of prevalence of 11% was reported in healthy Indian population by TM Suri et al<sup>111</sup> in a systematic review conducted by them. A relatively higher prevalence of 48.1% was seen in specific patient groups in our study. Considering a sample of 17706 of a heterogeneous group, the least prevalence was in a study done using baseline questionnaires on a healthy population which was also 3%! In a questionnaire based study in Morocco, 13.9% had witnessed apnea<sup>112</sup>. OSA prevalence studies worldwide showed a wide variability in the type of outcome and instrument used. Studies also utilised screening questionnaires followed by sleep studies<sup>52,113,114</sup>. Questionnaire based studies in Thailand reported 58.5% snoring and 4.8% prevalence of snoring and OSA respectively<sup>114</sup>. In some studies, an increased association with BMI and Adjusted neck circumference was found.

Needless to say, that the disease burden exists at all age groups and hence a comprehensive strategy will benefit not only in overcoming the specific problem but will also help avert the onset of co morbidities like cardiovascular disorder, stroke, metabolic syndrome, etc. which are often associated with OSA. A study done in 2016 showed that the older population who were having witnessed apnea had more severe OSA<sup>102</sup>. Here is the need to prevent the build-up of the disease for more productive and disease-free life later. Strategies aiming on prevention, regular screening, and treatment of the affected population even in its milder forms might reduce this burden. An analysis of prevalence of snoring itself is alarming by its presence in 6-12-year-olds, medical undergraduates and in population-based studies. At the first place why one should be snoring as a child or young adult? Possible reason might be a relative lack of awareness amongst the parents and young adults. Also at

the primary care level, even if the patient does complain about snoring, there is lack of availability of what to do in the form of guidelines at the National level. Hence awareness campaigns at schools and colleges and empowering our primary care with standard guidelines is the need of the day.

After the COVID pandemic, sleep management probably does not remain the domain of a sleep expert alone but contribution from every healthcare professional is required. Enhancing sleep education in healthcare curriculum and ensuring that the referral systems are developed for professional handling of the disorder is required.

Excessive daytime sleepiness (EDS) also remained an important symptom to be analysed because of the repercussions of the symptom of safety issues at work, health and economy of the society and hence was also taken separately for subgroup analysis. EDS was found to be associated with OSA, in insomniacs and in RLS patients. Various instruments like surveys, face to face interviews were used to study prevalence. RLS with insomnia was also reported by Kumar et al in Parkinson's disease patients<sup>28</sup> and RLS with OSA was reported in pulmonary tuberculosis<sup>90</sup>. Using questionnaires, Amyotrophic Lateral Sclerosis patients were found to have insomnia in 65%, snoring in 45% and 5% had a risk of RLS<sup>19</sup>. This makes it an important matter of concern because of the impact of excessive daytime sleepiness on the productivity of the individual, and on safety and health. The presenteeism of an employee can have disastrous consequences. Secondly another point which drives home is the very instruments which help in the calculation of excessive daytime sleepiness; how is it labelled excessive, what are the factors associated with EDS and Is there any role in having a task force to dwell on this concept further since it has repercussions on both health and economy of the society?

At a national level, there is a felt need to develop frameworks to promote sleep health by promotive, preventive, curative, and rehabilitative mechanisms. National societies have been doing education programs in sleep for medical colleges, doctors, and technicians. There have been efforts also to raise awareness amongst school children by holding symposiums for school children and for school counsellors. Overall health enhancement using comprehensive public health programs aiming at good sleep promotion may be required.

Though our study has been an extensive review of all the studies relevant to the objective but there are certain limitations. Exact prevalence in the population is still not clear due to a high heterogeneity of the data. Hence, a task force to develop prevalence studies may be deployed for insomnia and OSA. Awareness material developed by sleep experts may be put up on national portals for free access to population.

To conclude, India has a health burden of sleep disorders, and a need to develop strategies to manage them early is imminent. The need to develop standardised protocols to study prevalence of various sleep disorders on a national level remains pivotal.

### Legends of Figures

Figure1: Flow chart of studies screened and included

Figure 2: Forest plot of subgroup analysis- Insomnia

Figure 3: Forest plot of subgroup analysis- Obstructive Sleep Apnea

Figure 4: Forest plot of subgroup analysis- Restless Leg Syndrome

Supplementary material S1: Detailed search strategy

Supplementary Figures 1: Forest Plots of pooled insomnia data

Supplementary Figures 2: Forest Plots of pooled obstructive sleep apnea data

Supplementary Figures 3: Forest Plots of pooled Restless Leg Syndrome data

Supplementary Figures 4: Forest Plots of pooled data of Excessive Daytime Sleepiness

### References

1. Datta K, Tripathi M. Sleep and Covid-19. *Neurology India* 2021; 69: 26.
2. Forrester N. How better sleep can improve productivity. *Nature* 2023; 619: 659–661.

3. Page MJ, McKenzie JE, Bossuyt PM, et al. The PRISMA 2020 statement: an updated guideline for reporting systematic reviews. *BMJ* 2021; n71.
4. Munn Z, Moola S, Riitano D, et al. The development of a critical appraisal tool for use in systematic reviews addressing questions of prevalence. *Int J Health Policy Manag* 2014; 3: 123–128.
5. Aggarwal HK, Jain D, Dabas G, et al. Prevalence of Depression, Anxiety and Insomnia in Chronic Kidney Disease Patients and their Co-Relation with the Demographic Variables. *Pril (Makedon Akad Nauk Umet Odd Med Nauki)* 2017; 38: 35–44.
6. Ahmad S, Gupta M, Gupta R, et al. Prevalence and correlates of insomnia and obstructive sleep apnea in chronic kidney disease. *N Am J Med Sci* 2013; 5: 641–646.
7. Jain A, Sharmab R, Yadavc N, et al. Quality of life and its association with insomnia and clinical variables in type 2 diabetes. *J Egypt Public Health Assoc* 2017; 92: 52–59.
8. Dahale AB, Jaisoorya TS, Manoj L, et al. Insomnia Among Elderly Primary Care Patients in India. *Prim Care Companion CNS Disord* 2020; 22: 19m02581.
9. Uvais NA, Nalakath MJ, Jose K. Facing COVID-19: Psychological Impacts on Hospital Staff in a Tertiary Care Private Hospital in India. *Prim Care Companion CNS Disord* 2021; 23: 20m02843.
10. Panda S, Taly AB, Sinha S, et al. Sleep-related disorders among a healthy population in South India. *Neurol India* 2012; 60: 68–74.
11. Shivashankar R, Kondal D, Ali MK, et al. Associations of Sleep Duration and Disturbances With Hypertension in Metropolitan Cities of Delhi, Chennai, and Karachi in South Asia: Cross-Sectional Analysis of the CARRS Study. *Sleep* 2017; 40: zsx119.
12. Katyayan A, Yadav V, Mishra P, et al. Computer Algorithms in Assessment of Obstructive Sleep Apnoea Syndrome and Its Application in Estimating Prevalence of Sleep Related Disorders in Population. *Indian J Otolaryngol Head Neck Surg* 2019; 71: 352–359.
13. Dewan H, Abdul NS, Mandal NB, et al. Sleep Disorders among Dental Students: An Original Research. *J Pharm Bioallied Sci* 2022; 14: S275–S276.
14. Jain A, Sharma R, Gaur KL, et al. Study of internet addiction and its association with depression and insomnia in university students. *J Family Med Prim Care* 2020; 9: 1700–1706.
15. Kumar N, Goyal A, Hussain A, et al. SARS-CoV-2 infection is associated with increased odds of insomnia, RLS and dream enactment behavior. *Indian J Psychiatry* 2022; 64: 354–363.
16. Khan IW, Juyal R, Shikha D, et al. Generalized Anxiety disorder but not depression is associated with insomnia: a population based study. *Sleep Sci* 2018; 11: 166–173.
17. Sreedharan SE, Agrawal P, Rajith RS, et al. Clinical and polysomnographic predictors of severe obstructive sleep apnea in the South Indian population. *Ann Indian Acad Neurol* 2016; 19: 216–220.
18. Jaisoorya TS, Dahale AB, Sunil KG, et al. Insomnia in primary care—a study from India. *Sleep Health* 2018; 4: 63–67.
19. Panda S, Gourie-Devi M, Sharma A. Sleep disorders in amyotrophic lateral sclerosis: A questionnaire-based study from India. *Neurol India* 2018; 66: 700–708.
20. Mondal G, Bajaj V, Goyal BL, et al. Prevalence of sleep disorders and severity of insomnia in psychiatric outpatients attending a tertiary level mental health care facility in Punjab, India. *Asian J Psychiatr* 2018; 32: 8–13.
21. Jain A, Mittal RS, Sharma A, et al. Study of insomnia and associated factors in traumatic brain injury. *Asian J Psychiatr* 2014; 8: 99–103.
22. Rai M, Rustagi T, Rustagi S, et al. Depression, insomnia and sleep apnea in patients on maintenance hemodialysis. *Indian J Nephrol* 2011; 21: 223–229.
23. Naik S, Haldar SN, Soneja M, et al. Post COVID-19 sequelae: A prospective observational study from Northern India. *Drug Discov Ther* 2021; 15: 254–260.
24. Tomar S, Sharma A, Jain A, et al. Study of Fatigue and Associated Factors in Traumatic Brain Injury and Its Correlation with Insomnia and Depression. *Asian J Neurosurg* 2018; 13: 1061–1065.

25. Kumar A, Gupta R, Gupta R. Prevalence and correlates of poor sleep quality in chronic liver disease patients. *Sleep Sci* 2021; 14: 266–272.
26. Devaraj U, Ramachandran P, Dsouza G. Obstructive Sleep Apnea in Patients with Myocardial Infarction: Experience from a Tertiary Care Hospital in South India. *Heart India* 2013; 1: 12.
27. Ramakrishnan N, Ranganathan L, Isabel M, et al. Sleep Medicine in India: Are Patients Better Informed Than Referral Physicians? *Chest* 2012; 142: 1069A.
28. Kumar N, Gupta R, Kumar H, et al. Impact of home confinement during COVID-19 pandemic on sleep parameters in Parkinson's disease. *Sleep Med* 2021; 77: 15–22.
29. Jasti DB, Mallipeddi S, Apparao A, et al. Quality of Sleep and Sleep Disorders in Patients with Parkinsonism: A Polysomnography Based Study from Rural South India. *J Neurosci Rural Pract* 2018; 9: 92–99.
30. Kishan S, Rao MS, Ramachandran P, et al. Prevalence and Patterns of Sleep-Disordered Breathing in Indian Heart Failure Population. *Pulm Med* 2021; 2021: 9978906.
31. Shanmugam GV, Abraham G, Mathew M, et al. Obstructive sleep apnea in non-dialysis chronic kidney disease patients. *Ren Fail* 2015; 37: 214–218.
32. Singh A, Chaudhary SC, Gupta KK, et al. Prevalence of obstructive sleep apnea in diabetic patients. *Ann Afr Med* 2021; 20: 206–211.
33. Viswanathan V, Ramalingam IP, Ramakrishnan N. High Prevalence of Obstructive Sleep Apnea among People with Type 2 Diabetes Mellitus in a Tertiary Care Center. *J Assoc Physicians India* 2017; 65: 38–42.
34. Malik JA, Masoodi SR, Shoib S. Obstructive sleep apnea in Type 2 diabetes and impact of continuous positive airway pressure therapy on glycemic control. *Indian J Endocrinol Metab* 2017; 21: 106–112.
35. Goyal A, Pakhare AP, Bhatt GC, et al. Association of pediatric obstructive sleep apnea with poor academic performance: A school-based study from India. *Lung India* 2018; 35: 132–136.
36. Sharma SK, Sreenivas V. Are metabolic syndrome, obstructive sleep apnoea & syndrome Z sequential?--a hypothesis. *Indian J Med Res* 2010; 131: 455–458.
37. Sharma SK, Reddy EV, Sharma A, et al. Prevalence and risk factors of syndrome Z in urban Indians. *Sleep Med* 2010; 11: 562–568.
38. Shailly Saxena DG JM Joshi. Prevalence of symptoms and risk of sleep disordered breathing in Mumbai (India). *Indian Journal of Sleep Medicine (IJSM)* 2006; Vol. 1, No. 1, 2006: 5.
39. Joseph N, Shreeshaina null, Loliem SSB, et al. An assessment of risks associated with obstructive sleep apnea and its relationship with adverse health outcomes among pregnant women. A multi-hospital based study. *Adv Respir Med* 2020; 88: 327–334.
40. Choudhury A, Routray D, Swain S, et al. Prevalence and risk factors of people at-risk of obstructive sleep apnea in a rural community of Odisha, India: a community based cross-sectional study. *Sleep Med* 2019; 58: 42–47.
41. Pinto A, Devaraj U, Ramachandran P, et al. Obstructive Sleep Apnea in a rural population in South India: Feasibility of health care workers to administer level III sleep study. *Lung India* 2018; 35: 301.
42. Aggarwal K, Akhtar N, Mallick H. Sleep quality mediates the relationship between risk of obstructive sleep apnea and acute stress in young adults. *J Physiol Pharmacol*; 72. Epub ahead of print February 2021. DOI: 10.26402/jpp.2021.1.11.
43. Agrawal S, Sharma SK, Sreenivas V, et al. Prevalence of metabolic syndrome in a north Indian hospital-based population with obstructive sleep apnoea. *Indian J Med Res* 2011; 134: 639–644.
44. Surya Kant Neha Kapoor, Ajay Kumar Verma, SK Verma, RAS Kushwaha, Santosh Kumar, Rajiv Garg, Ved Prakash, Anuj Kumar Pandey. Psychiatric Manifestations in the Patients of Obstructive Sleep Apnea at Tertiary Care Center of Northern India. *Indian Journal of Respiratory Care* 2019; Volume 8: 3.

45. Anand V, Shukla G, Gupta N, et al. Association of Sleep Apnea With Development and Behavior in Down Syndrome: A Prospective Clinical and Polysomnographic Study. *Pediatr Neurol* 2021; 116: 7–13.
46. Nanaware SKV, Gothi D, Joshi JM. Sleep apnea. *Indian J Pediatr* 2006; 73: 597–601.
47. Kaswan R, Bansal R, Katoch D, et al. Screening for obstructive sleep apnea in a diabetic retinopathy clinic in a tertiary care center. *Indian J Ophthalmol* 2021; 69: 3349–3357.
48. Devaraj U, Rajagopala S, Kumar A, et al. Undiagnosed Obstructive Sleep Apnea and Postoperative Outcomes: A Prospective Observational Study. *Respiration* 2017; 94: 18–25.
49. Lorenzoni G, Azzolina D, Sethi G, et al. Identifying Pathways Mediating Obstructive Sleep Apnea and Obesity in Indian Children. *Indian J Pediatr* 2019; 86: 15–19.
50. Dixit R, Verma S, Gupta N, et al. Obstructive Sleep Apnea in Bronchial Asthma Patients: Assessment of Prevalence and Risk Factors. *J Assoc Physicians India* 2018; 66: 45–48.
51. Tripathi A, Bagchi S, Singh J, et al. Incidence of Obstructive Sleep Apnea in Elderly Edentulous Patients and the Possible Correlation of Serum Serotonin and Apnea-Hypopnea Index. *J Prosthodont* 2019; 28: e843–e848.
52. Reddy EV, Kadiravan T, Mishra HK, et al. Prevalence and risk factors of obstructive sleep apnea among middle-aged urban Indians: a community-based study. *Sleep Med* 2009; 10: 913–918.
53. Mahajan SK, Verma BS, Sharma S, et al. Prevalence of obstructive sleep apnoea among patients admitted with acute coronary syndrome in a hill state of northern India. *Natl Med J India* 2021; 34: 337–340.
54. Prasad KT, Sehgal IS, Agarwal R, et al. Assessing the likelihood of obstructive sleep apnea: a comparison of nine screening questionnaires. *Sleep Breath* 2017; 21: 909–917.
55. Kamgo T, Spalgais S, Kumar R. Prevalence and Profile of Obstructive Sleep Apnea in Patients with Interstitial Lung Diseases of North India. *J Assoc Physicians India* 2022; 70: 11–12.
56. Kumar R, Nagar D, Mallick A, et al. Obstructive sleep apnoea and atopy among middle aged chronic obstructive pulmonary disease and bronchial asthma patients. *J Assoc Physicians India* 2013; 61: 615–618.
57. Sehgal IS, Dhooria S, Viridi S, et al. A Study to Evaluate the Effect of Body Mass Index on the Prevalence of Sleep-Disordered Breathing in Adult Patients with Metabolic Syndrome. *Indian J Chest Dis Allied Sci* 2016; 58: 177–181.
58. Nair SC, Arjun P, Azeez AK, et al. Proportion of rapid eye movement sleep related obstructive sleep apnea (REM related OSA) in patients with sleep disordered breathing: A cross sectional study. *Lung India* 2022; 39: 38–43.
59. Priyadarshini P, Singh VP, Aggarwal S, et al. Impact of bariatric surgery on obstructive sleep apnoea-hypopnea syndrome in morbidly obese patients. *J Minim Access Surg* 2017; 13: 291–295.
60. Nattusami L, Hadda V, Khilnani GC, et al. Co-existing obstructive sleep apnea among patients with chronic obstructive pulmonary disease. *Lung India* 2021; 38: 12–17.
61. Shoib S, Malik JA, Masoodi S. Depression as a Manifestation of Obstructive Sleep Apnea. *J Neurosci Rural Pract* 2017; 8: 346–351.
62. Utpat K, Gupta A, Desai U, et al. Prevalence and profile of sleep-disordered breathing and obstructive sleep apnea in patients with interstitial lung disease at the pulmonary medicine department of a tertiary care hospital in Mumbai. *Lung India* 2020; 37: 415–420.
63. Bhaiare S, Gupta R, Saini J, et al. Sleep-Disordered Breathing in Newly Diagnosed Patients of Lung Cancer. *Cureus* 2022; 14: e25230.
64. Agrawal S, Gupta R, Lahan V, et al. Prevalence of obstructive sleep apnea in surgical patients presenting to a tertiary care teaching hospital in India: A preliminary study. *Saudi J Anaesth* 2013; 7: 155–159.
65. Kaul S, Meena AK, Murthy JM. Sleep apnoea syndromes: clinical and polysomnographic study. *Neurol India* 2001; 49: 47–50.

66. Jain A, Sahni JK. Polysomnographic studies in children undergoing adenoidectomy and/or tonsillectomy. *J Laryngol Otol* 2002; 116: 711–715.
67. Ghosh P, Sapna Varma NK, Ajith VV, et al. Epidemiological study on prevalent risk factors and craniofacial skeletal patterns in obstructive sleep apnea among South Indian population. *Indian J Dent Res* 2020; 31: 784–790.
68. Tripathi A, Bagchi S, Singh J, et al. Lifestyle and Occupational Stress: A Potential Risk Factor for Obstructive Sleep Apnea in Nonobese Male Subjects. *J Prosthodont* 2018; 27: 716–721.
69. Singh P, Chopra M, Vardhan V. Detection of obstructive sleep apnea in young patients suffering from coronary artery disease by performing portable polysomnography studies. *Med J Armed Forces India* 2022; 78: 394–399.
70. Dubey A, Bajaj DK, Mishra A, et al. Obstructive sleep apnea risk for driving license applicants in India - A community based study. *Int J Occup Med Environ Health* 2018; 31: 25–36.
71. Mathiyalagen P, Govindasamy V, Rajagopal A, et al. Magnitude and Determinants of Patients at Risk of Developing Obstructive Sleep Apnea in a Non-Communicable Disease Clinic. *Medicina (Kaunas)* 2019; 55: 391.
72. Kumar M, Kainth S, Kumar S, et al. Prevalence of and Factors Associated with Sleep-Wake Abnormalities in Patients with Cirrhosis. *J Clin Exp Hepatol* 2021; 11: 453–465.
73. Rohatgi R, Gupta R, Ray R, et al. Is obstructive sleep apnea the missing link between metabolic syndrome and second-generation antipsychotics: Preliminary study. *Indian J Psychiatry* 2018; 60: 478–484.
74. Ahmad L, Kapoor P, Bhaskar S, et al. Screening of obstructive sleep apnea (OSA) risk in adolescent population and study of association with craniofacial and upper airway morphology. *J Oral Biol Craniofac Res* 2020; 10: 807–813.
75. Selvaraj VK, Keshavamurthy B. Sleep Dysfunction in Parkinson's Disease. *J Clin Diagn Res* 2016; 10: OC09-12.
76. Bhagawati J, Kumar S, Agrawal AK, et al. Impact of different stages of chronic kidney disease on the severity of Willis-Ekbom disease. *J Family Med Prim Care* 2019; 8: 432–436.
77. Pinheiro T, Thomas T, Devaraj U, et al. Prevalence of restless legs syndrome and quality of sleep in type 2 diabetics. *J Diabetes Complications* 2020; 34: 107727.
78. Gupta R, Ulfberg J, Allen RP, et al. High prevalence of restless legs syndrome/Willis Ekbom Disease (RLS/WED) among people living at high altitude in the Indian Himalaya. *Sleep Med* 2017; 35: 7–11.
79. Rangarajan S, Rangarajan S, D'Souza GA. Restless legs syndrome in an Indian urban population. *Sleep Med* 2007; 9: 88–93.
80. Bellur S, Thota SS, Raj JP, et al. Prevalence and Predictors of Restless Leg Syndrome in Adolescents and Young Adults of Bengaluru City, India: A Cross-Sectional Study. *Neuroepidemiology* 2022; 56: 298–305.
81. Joseph N, Suresh S, Prasad S, et al. Study on restless leg syndrome and its relationship with quality of sleep among the general population of India. 2022; 244412 Bytes.
82. Gupta R, Lahan V, Goel D. Restless Legs Syndrome: a common disorder, but rarely diagnosed and barely treated--an Indian experience. *Sleep Med* 2012; 13: 838–841.
83. Halkurike-Jayadevappa VK, Goel A, Paliwal VK, et al. Liver disease severity is poorly related to the presence of restless leg syndrome in patients with cirrhosis. *Neurol India* 2019; 67: 732–737.
84. Bhowmik D, Bhatia M, Gupta S, et al. Restless legs syndrome in hemodialysis patients in India: a case controlled study. *Sleep Med* 2003; 4: 143–146.
85. Gupta R, Ali R, Ray R. Willis-Ekbom disease/restless legs syndrome in patients with opioid withdrawal. *Sleep Med* 2018; 45: 39–43.
86. Bathla N, Ahmad S, Gupta R, et al. Prevalence and correlates of Willis-Ekbom's disease/restless legs syndrome in patients undergoing hemodialysis. *Saudi J Kidney Dis Transpl* 2016; 27: 685–691.

87. Gupta A, Shukla G, Mohammed A, et al. Restless legs syndrome, a predictor of subcortical stroke: a prospective study in 346 stroke patients. *Sleep Med* 2017; 29: 61–67.
88. Velu S, Rajagopalan A, Arunachalam J, et al. Subjective Assessment of Sleep Quality and Excessive Daytime Sleepiness in Conventional Hemodialysis Population: A Single-Center Experience. *Int J Nephrol Renovasc Dis* 2022; 15: 103–114.
89. Gupta R, Lahan V, Goel D. Prevalence of restless leg syndrome in subjects with depressive disorder. *Indian J Psychiatry* 2013; 55: 70–73.
90. Raj JP, Ramesh N. Quality of sleep among patients diagnosed with tuberculosis-a cross-sectional study. *Sleep Breath* 2021; 25: 1369–1377.
91. Raj JP, Hansdak SG, Naik D, et al. SLEep among diabetic patients and their Glycaemic control (SLEDGE): A pilot observational study. *J Diabetes* 2019; 11: 122–128.
92. Kaur G, Singh A. Excessive daytime sleepiness and its pattern among Indian college students. *Sleep Med* 2017; 29: 23–28.
93. Singh A, Prasad R, Garg R, et al. A study to estimate prevalence and risk factors of Obstructive Sleep Apnoea Syndrome in a semi-urban Indian population. *Monaldi Arch Chest Dis* 2017; 87: 773.
94. Roopa M, Deepa M, Indulekha K, et al. Prevalence of sleep abnormalities and their association with metabolic syndrome among Asian Indians: Chennai Urban Rural Epidemiology Study (CURES-67). *J Diabetes Sci Technol* 2010; 4: 1524–1531.
95. Krishnaswamy UM, Chhabria MS, Rao A. Excessive sleepiness, sleep hygiene, and coping strategies among night bus drivers: A cross-sectional study. *Indian J Occup Environ Med* 2016; 20: 84–87.
96. Ghante A, Raj JP, Krishna B, et al. Prevalence and predictors of sleep deprivation and poor sleep quality and their associated perinatal outcomes during the third trimester of pregnancy. *J Taibah Univ Med Sci* 2021; 16: 359–364.
97. Dey R, Dutta S, Bhandari SS. Sleep Quality and Daytime Sleepiness among the Clinicians Working in a Tertiary Care Center in Sikkim, India. *Indian J Psychol Med* 2020; 42: 141–146.
98. Venkatnarayan K, Krishnaswamy UM, Rajamuri NKR, et al. Identifying phenotypes of obstructive sleep apnea using cluster analysis. *Sleep Breath*. Epub ahead of print 15 July 2022. DOI: 10.1007/s11325-022-02683-2.
99. Shoib S, Ullah I, Nagendrappa S, et al. Prevalence of mental illness in patients with obstructive sleep apnea - A cross-sectional study from Kashmir, India. *Ann Med Surg (Lond)* 2022; 80: 104056.
100. Samanta J, Dhiman RK, Khatri A, et al. Correlation between degree and quality of sleep disturbance and the level of neuropsychiatric impairment in patients with liver cirrhosis. *Metab Brain Dis* 2013; 28: 249–259.
101. Sharma P, Dikshit R, Shah N, et al. Excessive Daytime Sleepiness in Schizophrenia: A Naturalistic Clinical Study. *J Clin Diagn Res* 2016; 10: VC06–VC08.
102. Sreedharan SE, Mitta N, Unnikrishnan KP, et al. Preoperative screening for obstructive sleep apnea in cardiovascular patients - How useful is STOP-BANG questionnaire in the Indian context? *Ann Card Anaesth* 2021; 24: 308–312.
103. Mahajan S, Joshwa B, Khakha D. Fatigue and depression and sleep problems among hemodialysis patients in a tertiary care center. *Saudi J Kidney Dis Transpl* 2012; 23: 729.
104. Kadam Y, Patil S, Waghachavare V, Gore A. Influence of Various Lifestyle and Psychosocial Factors on Sleep Disturbances among the College Students: A Cross-Sectional Study from an Urban Area of India. *Journal of Krishna Institute of Medical Sciences University* 2016; 5: 51–60.
105. Das H, Moran AE, Pathni AK, et al. Cost-Effectiveness of Improved Hypertension Management in India through Increased Treatment Coverage and Adherence: A Mathematical Modeling Study. *gh* 2021; 16: 37.
106. Bansode B, Jungari DS. Economic burden of diabetic patients in India: A review. *Diabetes & Metabolic Syndrome: Clinical Research & Reviews* 2019; 13: 2469–2472.

107. Datta K, Shrivastava D (eds). *Making Sense of Sleep Medicine: a hands-on guide*. First edition. Boca Raton: CRC Press, 2023.
108. Richter SA, Ferraz-Rodrigues C, Schilling LB, et al. Effects of the COVID-19 pandemic on sleep quality in children and adolescents: A systematic review and meta-analysis. *J Sleep Res* 2023; 32: e13720.
109. Sharma M, Aggarwal S, Madaan P, et al. Impact of COVID-19 pandemic on sleep in children and adolescents: a systematic review and meta-analysis. *Sleep Med* 2021; 84: 259–267.
110. Arora M, Datta K, Singh SP, et al. Sleep Loss in School Children: Fact or Myth. *Indian J Physiol Pharmacol* 2019; 63: 105–112.
111. Suri TM, Ghosh T, Mittal S, et al. Systematic review and meta-analysis of the prevalence of obstructive sleep apnea in Indian adults. *Sleep Medicine Reviews* 2023; 71: 101829.
112. Jniene A, El Ftouh M, Elfassy Fihry MT. Study of the prevalence of sleep apnea syndrome's symptoms in a Moroccan population. *Tuberk Toraks* 2012; 108–113.
113. Sharma SK, Kumpawat S, Banga A, et al. Prevalence and Risk Factors of Obstructive Sleep Apnea Syndrome in a Population of Delhi, India. *Chest* 2006; 130: 149–156.
114. Pilakasiri A, Mahakit P. Prospective study of the prevalence and co-morbidities of obstructive sleep apnea in active-duty army personnel in the three southernmost provinces of Thailand using questionnaire screening. *Military Med Res* 2018; 5: 39.



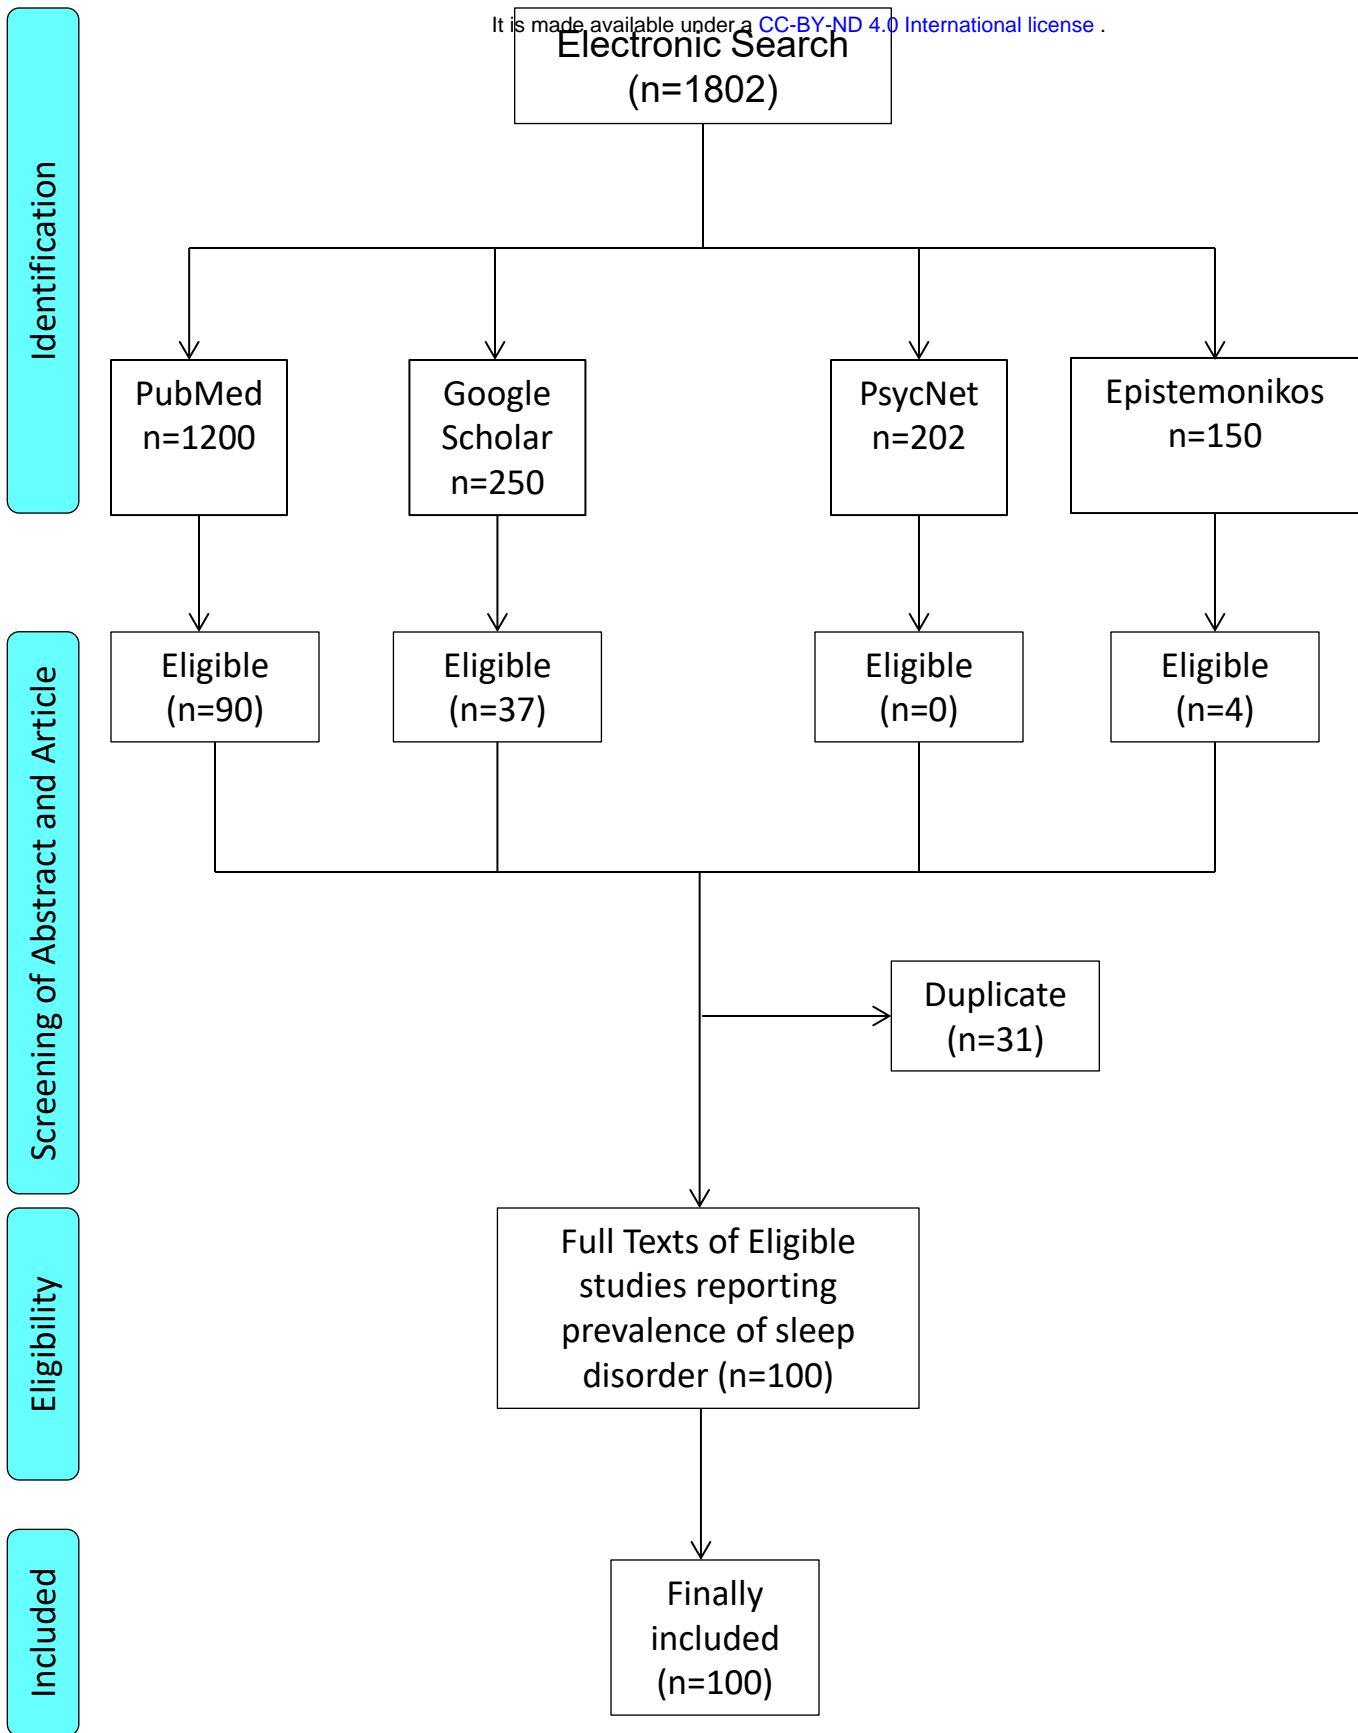

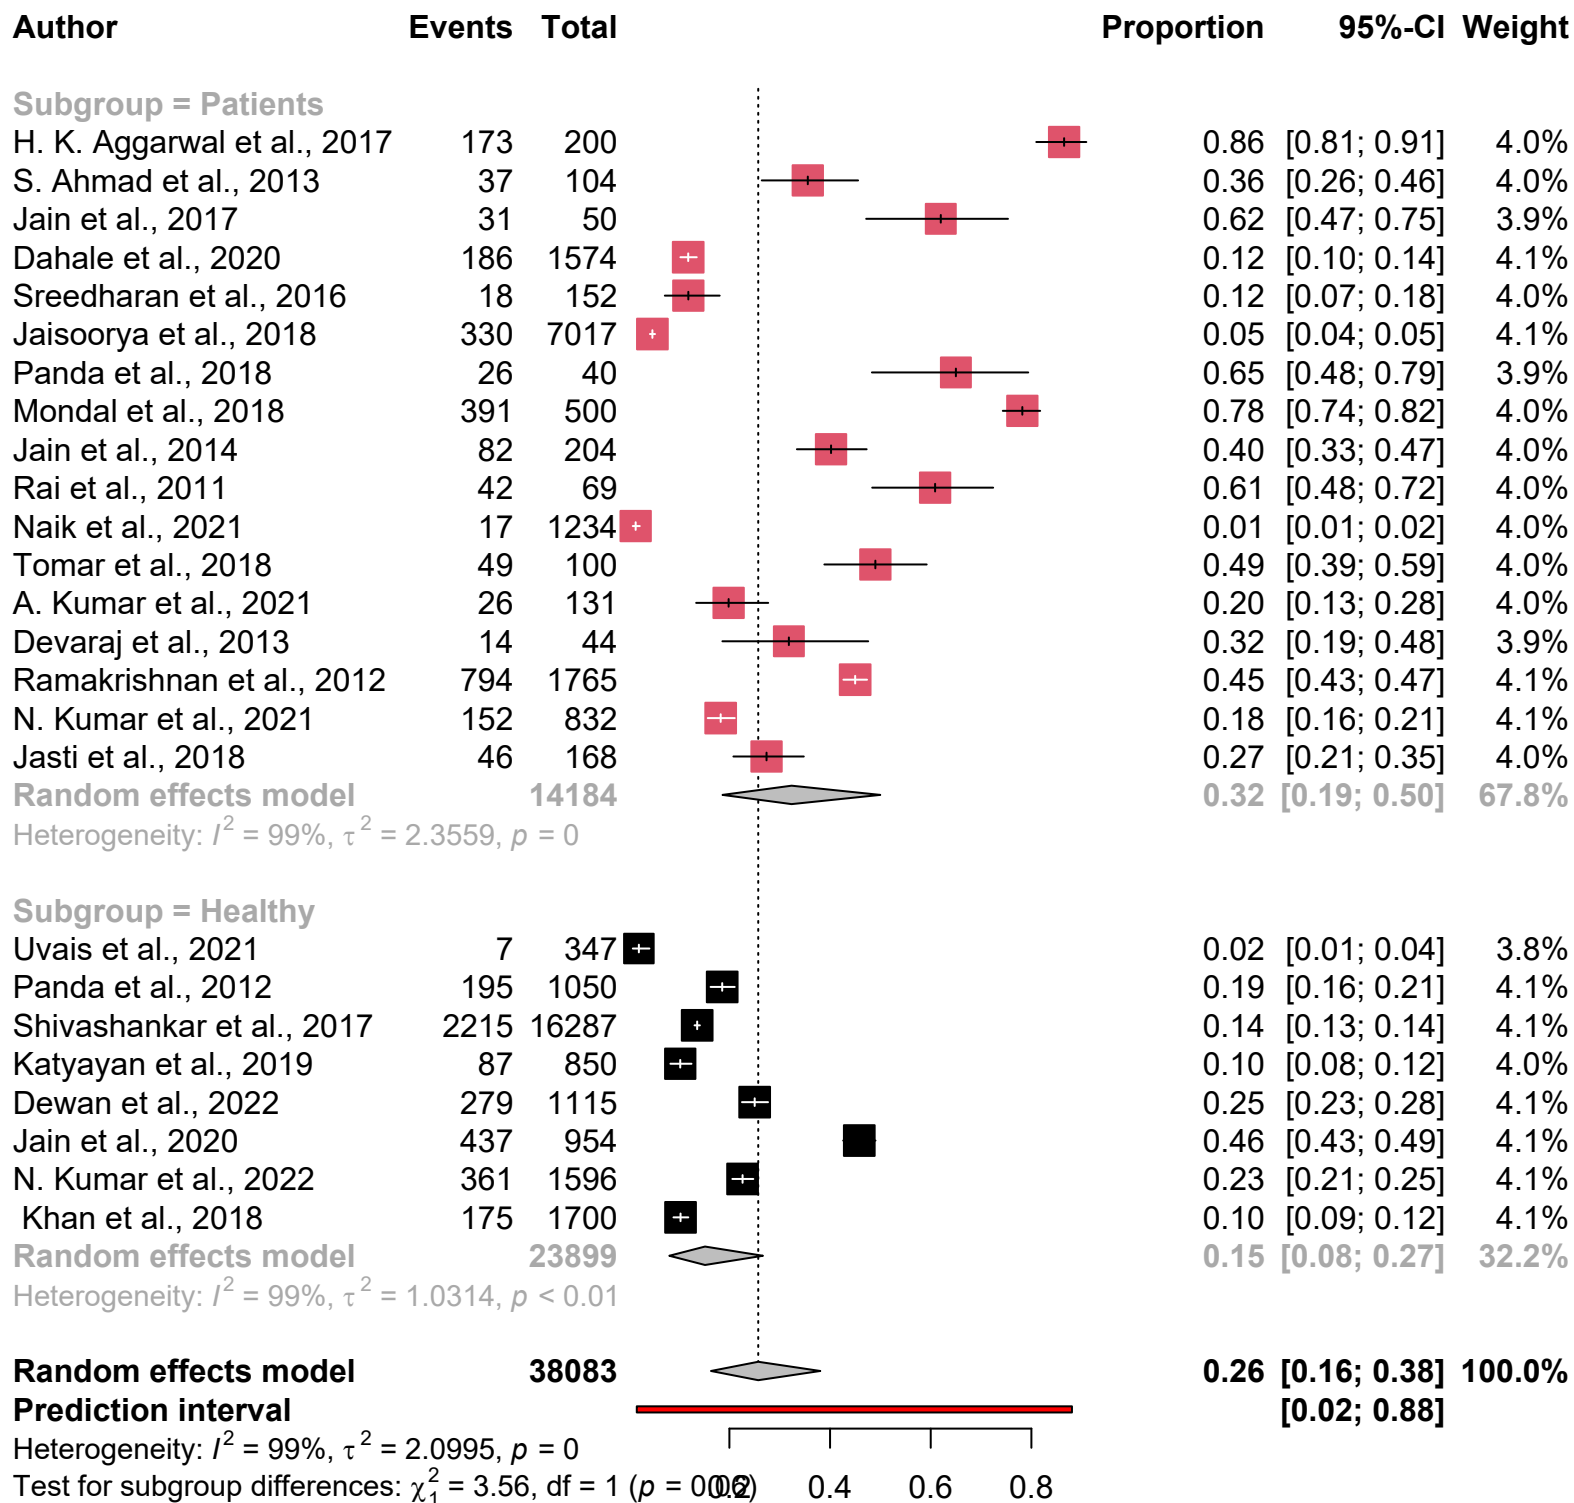

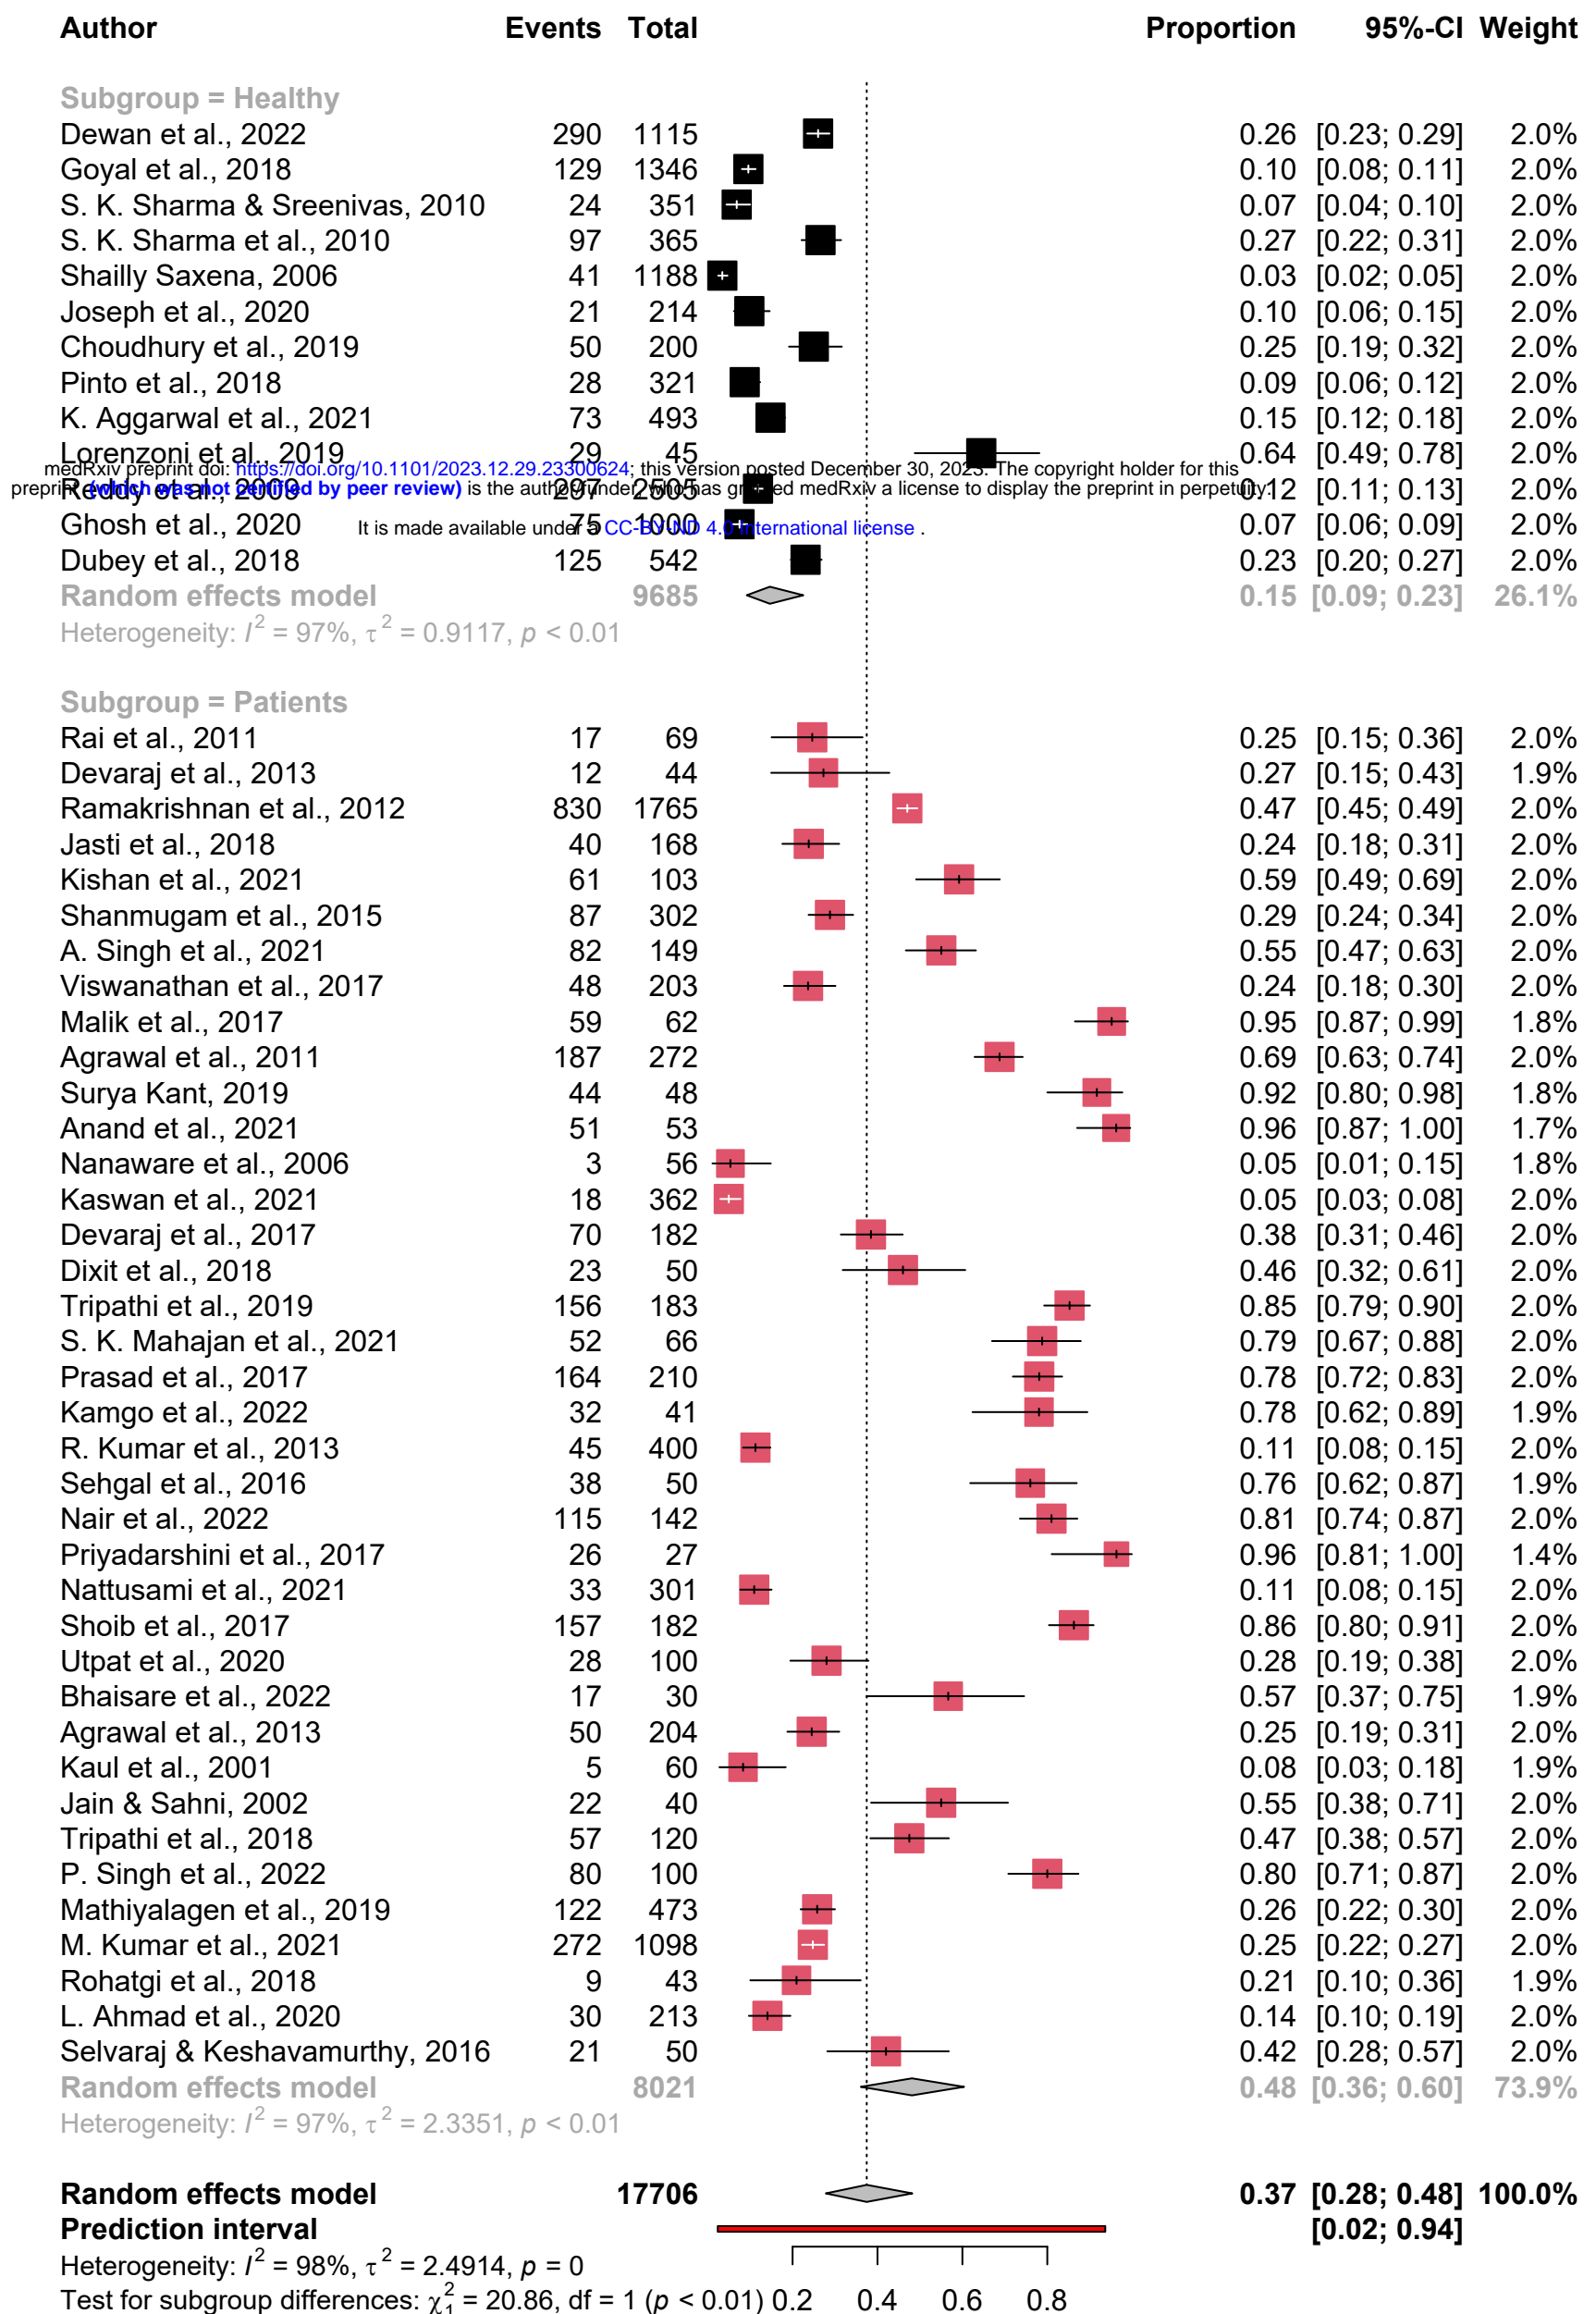

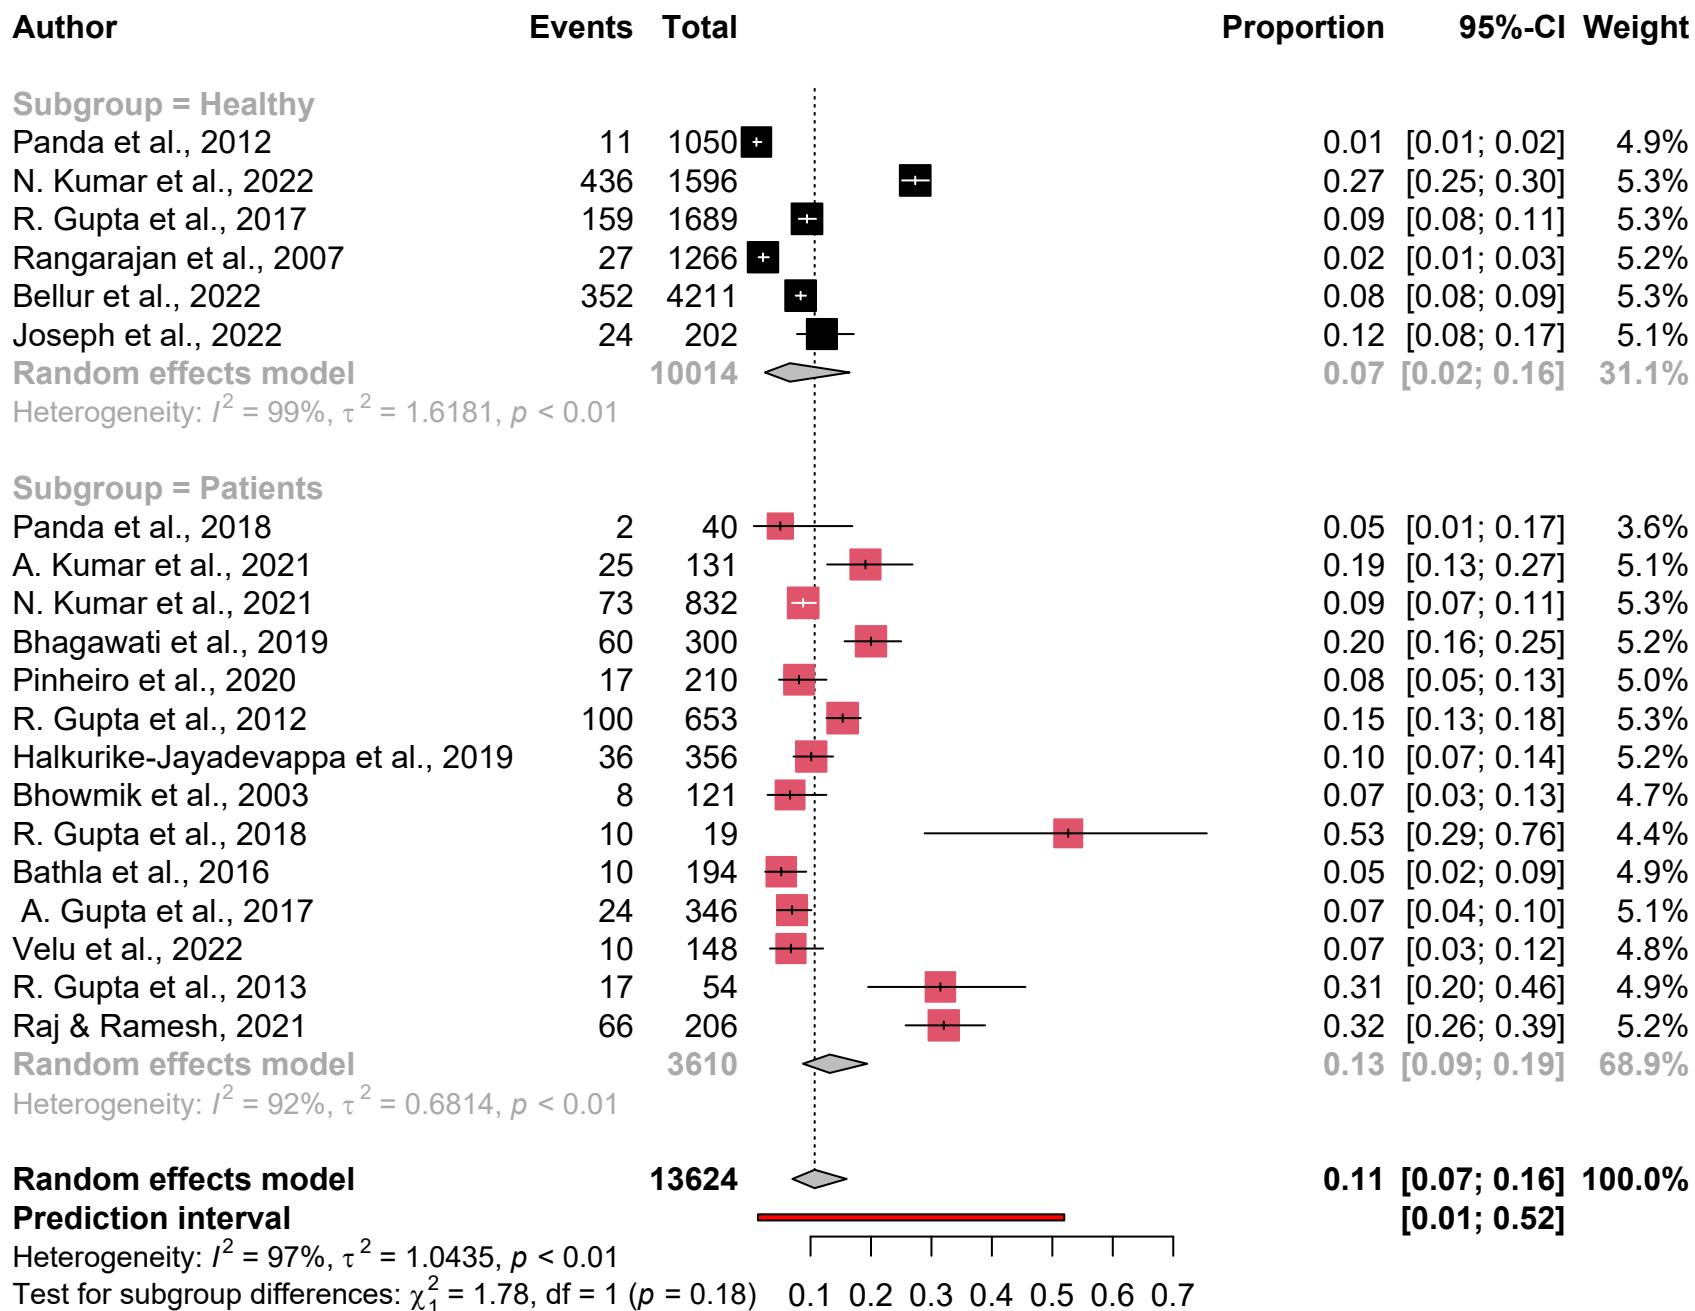

Source: https://medrxiv.org/content/10.1101/2023.12.29.23300624v1.full.pdf
